# Supplementary material for: Serum Monounsaturated Triacylglycerol Predicts Steatohepatitis in Patients with Non-alcoholic Fatty Liver Disease and Chronic Hepatitis B
Source: PubMed Central journal article supplement (PMC5585331; doi:10.1038/s41598-017-11278-x), 2017-09-05
Supplement: 41598_2017_11278_MOESM1_ESM.pdf [file 41598_2017_11278_MOESM1_ESM.pdf]

**Serum Monounsaturated Triacylglycerol Predicts Steatohepatitis in Patients  
with Non-alcoholic Fatty Liver Disease and Chronic Hepatitis B**

**Short title: Serum Monounsaturated Triacylglycerol Predicts NASH**

Rui-xu Yang<sup>1</sup>, Chun-xiu Hu<sup>2</sup>, Wan-lu Sun<sup>1</sup>, Qin Pan<sup>1</sup>, Feng Shen<sup>1</sup>, Zhen Yang<sup>3</sup>, Qing  
Su<sup>3</sup>, Guo-wang Xu<sup>2</sup> & Jian-gao Fan<sup>1</sup>

<sup>1</sup>Center for Fatty Liver, Department of Gastroenterology, Xinhua Hospital, Shanghai  
Jiao Tong University School of Medicine, Shanghai 200092, China

<sup>2</sup>CAS Key Laboratory of Separation Science for Analytical Chemistry, Dalian  
Institute of Chemical Physics, Chinese Academy of Sciences, Dalian, China

<sup>3</sup> Department of Endocrinology, Xinhua Hospital, Shanghai Jiao Tong University  
School of Medicine, Shanghai 200092, China

Corresponding author:

Professor Jian-gao Fan (email: [fanjiangao@xinhumed.com.cn](mailto:fanjiangao@xinhumed.com.cn)) or Professor

Guo-wang Xu (email: [xugw@dicp.ac.cn](mailto:xugw@dicp.ac.cn))

**Supplementary Table. Lipid classes detected in UPLC-MS/MS profiling**

| Lipid class     | Ion mode | Lipid classes                               | Number |
|-----------------|----------|---------------------------------------------|--------|
| Neutral lipid   | Positive | Cholesterol ester (CE)                      | 6      |
|                 |          | Diacylglycerol (DAG)                        | 5      |
|                 |          | Triacylglycerol (TAG)                       | 62     |
| Phospholipid    | Positive | Phosphatidylcholine (PC)                    | 28     |
|                 |          | Lysophosphatidylcholine (LPC)               | 16     |
|                 |          | Phosphatidylethanolamine (PE)               | 12     |
|                 |          | Lysophosphatidylethanolamine (LPE)          | 4      |
|                 | Negative | Phosphatidylinositol (PI)                   | 12     |
|                 |          | Phosphatidic acid (PA)                      | 1      |
|                 |          | Lysophosphatidylinositol (LPI)              | 2      |
| Plasmalogen     | Positive | Choline plasmalogen (PC-O)                  | 21     |
|                 |          | Ethanolamine plasmalogen (PE-O)             | 12     |
|                 |          | Lysophosphatidylcholine plasmalogen (LPC-O) | 3      |
|                 |          | Lysophosphatidylethanolamine plasmalogen    | 2      |
| Sphingolipid    | Positive | Sphingomyelin (SM)                          | 23     |
|                 |          | Ceramide (Cer)                              | 5      |
|                 |          | Hexosylceramide (HexCer)                    | 3      |
| Free fatty acid | Negative | Free fatty acid (FFA)                       | 22     |

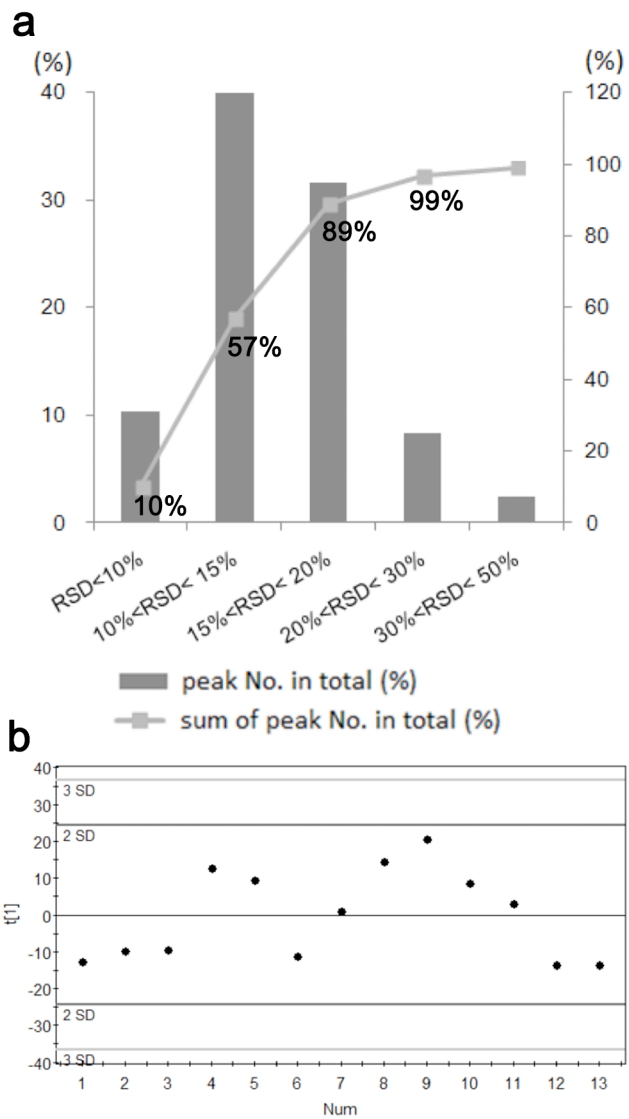

**Supplementary Figure.** Distribution of RSD in relative content of all peaks in QC samples **(a)** Percentage of peaks of different RSD distribution in QC samples. **(b)** Dynamic distribution of 13 QC samples throughout the analysis.
